# Supplementary material for: Co-Amended Synergistic Interactions between Arbuscular Mycorrhizal Fungi and the Organic Substrate-Induced Cucumber Yield and Fruit Quality Associated with the Regulation of the AM-Fungal Community Structure under Anthropogenic Cultivated Soil
Source: MDPI journal article supplement (doi:10.3390/ijms20071539), 2019-03-27
Supplement: s1 [file s1]

**Co-amended synergistic interactions between AMF and the organic substrate-induced cucumber yield and fruit quality associated with the regulation of the AM-fungal community structure under anthropogenic PGVC soil.**

Ahmad Ali <sup>1</sup>, Muhammad Imran Ghani <sup>1</sup>, Haiyan Ding <sup>1</sup>, Zhihui Cheng <sup>1,\*</sup>, Muhammad Iqbal <sup>2</sup>

*1 College of Horticulture, Northwest A&F University, Yangling, Shaanxi 712100, China.*

*2 Department of Soil Science & SWC, PMAS-Arid Agriculture University, Rawalpindi-46300, Pakistan.*

\*Corresponding Author: Zhihui Cheng

E-mail: chengzh@nwsuaf.edu.cn

Phone & fax number: +86 29 87082613

**Supporting Information**

6Tables

1 Figure

**Table S1:** Basic characteristics of replanted anthrosols and garlic stalk before experiment

| Parameters                                     | Replanted soil | Garlic substrate |
|------------------------------------------------|----------------|------------------|
| pH (1:5 soil: water)                           | 7.75           | 7.25             |
| EC ( $\mu\text{S}\cdot\text{cm}^{-1}$ )        | 582            | 671              |
| Organic C ( $\text{g}\cdot\text{kg}^{-1}$ )    | 6.59           | 411.39           |
| Total N ( $\text{g}\cdot\text{kg}^{-1}$ )      | 1.438          | 8.43             |
| C:N                                            | 9.45           | 45               |
| Total P ( $\text{g}\cdot\text{kg}^{-1}$ )      | 0.93           | 18.74            |
| Total K ( $\text{g}\cdot\text{kg}^{-1}$ )      | 7.15           | 10.27            |
| Available N ( $\text{mg}\cdot\text{kg}^{-1}$ ) | 53.65          | -                |
| Available P ( $\text{mg}\cdot\text{kg}^{-1}$ ) | 59.41          | -                |
| Available K ( $\text{mg}\cdot\text{kg}^{-1}$ ) | 305.91         | -                |

**Table S2:** Correlation analysis between different growth indices

| Pearson's correlation between AMF development indices |                           |             |               |               |
|-------------------------------------------------------|---------------------------|-------------|---------------|---------------|
|                                                       | Fusarium wilt incidence % | ERH density | Spore density | Root activity |
| AMF colonization %                                    | -0.990*                   | 0.973*      | 0.975*        | 0.970*        |
| Fusarium wilt incidence %                             | 1                         | 0.782       | -0.964*       | -0.963*       |
| ERH density                                           |                           | 1           | 0.899         | 0.891         |
| Spore density                                         |                           |             | 1             | 0.999**       |
| Root activity                                         |                           |             |               | 1             |

\*Correlation is significant at the 0.05 level (2-tailed).

\*\*Correlation is significant at the 0.01 level (2-tailed).

**Table-S3:** Correlation analysis of plant growth and biomass with photosynthesis and leaf gas exchange attributes

|               | N-uptake | P-uptake | K-uptake | Yield  | Plant height | Leaf area | SFW     | RDW   |
|---------------|----------|----------|----------|--------|--------------|-----------|---------|-------|
| Chl a         | .997**   | .958*    | .977*    | .996** | .892         | .884      | 1.000** | .923  |
| Fusarium%     | -.917    | -.992**  | -.995**  | -.938  | -.828        | -.908     | -.934   | -.723 |
| Chl b         | .995**   | .926     | .928     | .999** | .935         | .935      | .990**  | .894  |
| Chl a+b       | .999**   | .907     | .972*    | .999** | .911         | .904      | .998**  | .917  |
| Root activity | .990**   | .942     | .946     | .997** | .915         | .928      | .992**  | .876  |
| Pn rate       | .986*    | .807     | .815     | .973*  | .862         | .814      | .984*   | .974* |
| Gs rate       | .976*    | .937     | .936     | .986*  | .966*        | .972*     | .965*   | .853  |
| Ci rate       | .997**   | .917     | .921     | .998** | .905         | .905      | .998**  | .907  |
| Tr rate       | .946     | .974*    | .972*    | .965*  | .942         | .982*     | .941    | .777  |

\*\*, Correlation is significant at the 0.01 level (2-tailed).

\*, Correlation is significant at the 0.05 level (2-tailed).

**Table-S4:** Correlation analysis of abundant AMF taxa with AMF development

| AMF taxa               | AM colonization (%) | Fusarium wilt incidence (%) | ERH density | Spore density | Root activity |
|------------------------|---------------------|-----------------------------|-------------|---------------|---------------|
| <i>Glomus</i>          | 0.975*              | -0.983*                     | 0.965*      | 0.991**       | 0.993**       |
| <i>Rhizophagous</i>    | 0.435               | -0.386                      | 0.592       | 0.238         | 0.210         |
| <i>Claroideoglomus</i> | -0.155              | 0.261                       | -0.055      | -0.289        | -0.322        |
| <i>Funneliformis</i>   | 0.940               | -0.972*                     | 0.894       | 0.954*        | 0.961*        |
| <i>Septoglomus</i>     | 0.779               | -0.848                      | 0.864       | 0.685         | 0.689         |
| <i>Paraglomus</i>      | -0.664              | 0.754                       | -0.617      | -0.716        | -0.738        |
| <i>Acaulospora</i>     | -0.273              | 0.407                       | -0.293      | -0.295        | -0.322        |
| <i>Diversispora</i>    | 0.664               | -0.754                      | 0.617       | 0.716         | 0.738         |
| <i>Redeckera</i>       | -0.932              | 0.937                       | -0.991**    | -0.832        | -0.823        |
| <i>Cetraspora</i>      | -0.806              | 0.729                       | -0.674      | -0.867        | -0.858        |
| <i>Gigaspora</i>       | 0.732               | -0.716                      | 0.859       | 0.564         | 0.545         |
| <i>Ambispora</i>       | 0.157               | -0.024                      | 0.179       | 0.074         | 0.041         |

\*, Correlation is significant at the 0.05 level (2-tailed).

\*\*, Correlation is significant at the 0.01 level (2-tailed).

**Table S5:** Pearson correlations (r) between AMF alpha-diversity and cucumber development

|                           | AMF alpha-diversity indices |        |        |         |         |
|---------------------------|-----------------------------|--------|--------|---------|---------|
|                           | OTUs                        | ACE    | Chao   | Shannon | Simpson |
| AMF colonization %        | 0.911                       | 0.899  | 0.866  | 0.963*  | 0.940   |
| Fusarium wilt incidence % | -0.859                      | -0.858 | -0.815 | -0.958* | -0.885  |
| ERH density               | 0.931                       | 0.945  | 0.914  | 0.999** | 0.864   |
| Spore density             | 0.826                       | 0.795  | 0.756  | 0.880   | 0.949   |
| Total soluble solid (TSS) | 0.808                       | 0.777  | 0.735  | 0.870   | 0.939   |
| Soluble sugar (SS)        | 0.803                       | 0.776  | 0.732  | 0.877   | 0.928   |
| Organic acid (OA)         | 0.834                       | 0.849  | 0.802  | 0.964*  | 0.818   |
| Vitamin C                 | 0.781                       | 0.828  | 0.785  | 0.940   | 0.655   |
| Soluble protein           | 0.699                       | 0.690  | 0.632  | 0.849   | 0.814   |
| Nitrate content           | 0.576                       | 0.581  | 0.513  | 0.782   | 0.688   |
| Fruit N-uptake            | -0.829                      | -0.840 | -0.793 | -0.958* | -0.829  |
| Fruit P-uptake            | 0.778                       | 0.732  | 0.695  | 0.809   | 0.951*  |
| Fruit K-uptake            | 0.794                       | 0.802  | 0.751  | 0.935   | 0.822   |
| Yield                     | 0.812                       | 0.818  | 0.769  | 0.943   | 0.835   |

\*:  $P < 0.05$ ; \*\*:  $P < 0.01$ .

**Table-S6.** Correlation analysis of abundant AMF taxa with cucumber fruit development

| AMF taxa               | TSS     | SS      | OA      | VC      | SP      | N-content | N-uptake | P-uptake | K-uptake | Yield  |
|------------------------|---------|---------|---------|---------|---------|-----------|----------|----------|----------|--------|
| <i>Glomus</i>          | 0.997** | 0.954*  | 0.827   | 0.985*  | 0.933   | -0.964*   | 0.968*   | 0.974*   | 0.976*   | 0.982* |
| <i>Rhizophagous</i>    | 0.212   | 0.423   | 0.555   | 0.130   | 0.039   | -0.396    | 0.142    | 0.327    | 0.348    | 0.155  |
| <i>Claroideoglomus</i> | -0.339  | -0.273  | -0.186  | -0.504  | -0.627  | 0.293     | -0.308   | -0.358   | -0.333   | -0.334 |
| <i>Funneliformis</i>   | 0.970*  | 0.962*  | 0.860   | 0.998** | 0.980*  | -0.971*   | 0.920    | 0.986*   | 0.982*   | 0.943  |
| <i>Septoglomus</i>     | 0.713   | 0.913   | 0.981*  | 0.812   | 0.846   | -0.902    | 0.581    | 0.892    | 0.887    | 0.630  |
| <i>Paraglomus</i>      | -0.757  | -0.776  | -0.709  | -0.886  | -0.956* | 0.787     | -0.684   | -0.825   | -0.808   | -0.720 |
| <i>Acaulospora</i>     | -0.353  | -0.482  | -0.529  | -0.565  | -0.713  | 0.484     | -0.238   | -0.521   | -0.497   | -0.290 |
| <i>Diversispora</i>    | 0.757   | 0.776   | 0.709   | 0.886   | 0.956*  | -0.787    | 0.684    | 0.825    | 0.808    | 0.720  |
| <i>Redeckera</i>       | -0.832  | -0.957* | -0.965* | -0.822  | -0.769  | 0.948     | -0.748   | -0.922   | -0.930   | -0.776 |
| <i>Cetraspora</i>      | -0.839  | -0.629  | -0.405  | -0.690  | -0.546  | 0.647     | -0.912   | -0.652   | -0.665   | -0.885 |
| <i>Gigaspora</i>       | 0.553   | 0.755   | 0.845   | 0.515   | 0.446   | -0.734    | 0.460    | 0.682    | 0.696    | 0.486  |
| <i>Ambispora</i>       | 0.015   | -0.036  | -0.064  | -0.203  | -0.378  | 0.044     | 0.085    | -0.099   | -0.070   | 0.048  |

\* Correlation is significant at the .05 level (2-tailed). \*\* Correlation is significant at the 0.01 level (2-tailed).

TSS: Total soluble solid; SS: Soluble sugar; OC: Organic acid; VC: Vitamin C; SP: Soluble protein; N-content: Nitrate content

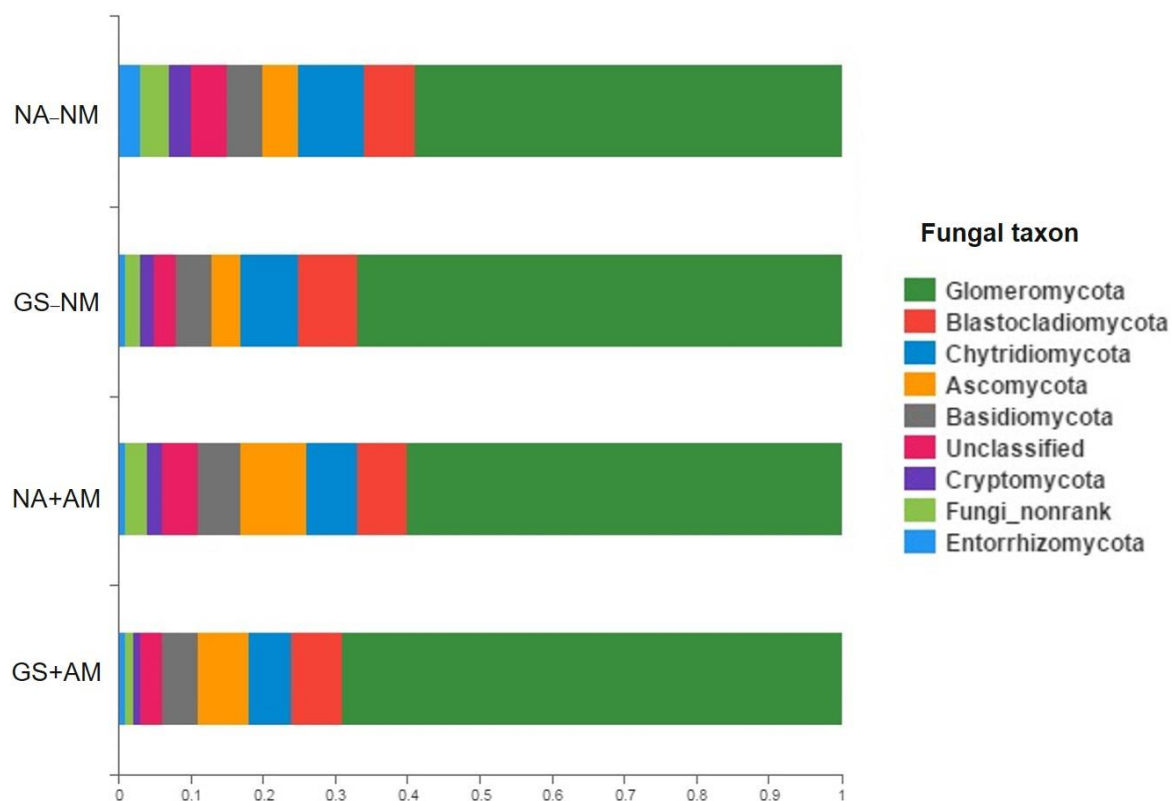

**Fig. S1.** The proportional relative abundance of in each fungal phylum detected using the primer set AMV4.5NF/AMDGR across all treatment samples. The treatments NA-NM, NA+AM, GS-NM and GS+AM represent the applied soil amendments. Non-amendment and non-mycorrhizal inoculation, non-amended Mycorrhizal Inoculation, Garlic stalk amended with non-mycorrhizal inoculum and Garlic stalk amended with mycorrhizal inoculum, respectively.

### Method S1 Calculations for Alpha-diversity indices

In the present study, Chao1 and Ace were used to estimate richness of microbial community. The larger value indicates the higher richness of community in both indices. Shannon's index and Simpson index were used to estimate diversity of microbial community. For Shannon's index, the larger value indicates the higher diversity; while for Simpson's index, the lower value indicates the higher diversity.

Chao1 was expressed by:

$$S_{chao1} = S_{obs} + \frac{n_1(n_1 - 1)}{2(n_2 + 1)}$$

Where  $S_{chao1}$  is the calculated numbers of OTUs;  $S_{obs}$  is the OTU numbers detected by sequencing;  $n_1$  is the number of "singletons";  $n_2$  is the number of "doubletons".

Ace was expressed by:

$$S_{ACE} = \begin{cases} S_{abund} + \frac{S_{rare}}{C_{ACE}} + \frac{n_1}{C_{ACE}} \hat{\gamma}_{ACE}^2, & \text{for } \hat{\gamma}_{ACE} < 0.80 \\ S_{abund} + \frac{S_{rare}}{C_{ACE}} + \frac{n_1}{C_{ACE}} \tilde{\gamma}_{ACE}^2, & \text{for } \hat{\gamma}_{ACE} \geq 0.80 \end{cases}$$

$$N_{rare} = \sum_{i=1}^{abund} i n_i, \quad C_{ACE} = 1 - \frac{n_1}{N_{rare}};$$

$$\hat{\gamma}_{ACE}^2 = \max \left[ \frac{S_{rare}}{C_{ACE}} \frac{\sum_{i=1}^{abund} i(i-1)n_i}{N_{rare}(N_{rare}-1)} - 1, 0 \right];$$

$$\tilde{\gamma}_{ACE}^2 = \max \left[ \hat{\gamma}_{ACE}^2 \left\{ 1 + \frac{N_{rare}(1-C_{ACE}) \sum_{i=1}^{abund} i(i-1)n_i}{N_{rare}(N_{rare}-C_{ACE})} \right\}, 0 \right]$$

Where  $n_i$  indicates the number of OTUs which sequences number is  $i$ ;  $S_{rare}$  indicates the number of OTUs which contain "abund" numbers or less than "abund" numbers of sequences;  $S_{abund}$  indicated the number of OTUs which contain more than "abund" numbers of sequences; abund indicate the threshold of average OTU and the defaults is "10".

Shannon's index was expressed by:

$$H_{\text{shannon}} = - \sum_{i=1}^{S_{\text{obs}}} \frac{n_i}{N} \ln \frac{n_i}{N}$$

Where  $S_{\text{obs}}$  indicates the number of detected OTUs;  $n_i$  indicates the number of sequences contained in the OTU numbered as "i";  $N$  indicates the total number of sequences.

Simpson's index was expressed by:

$$D_{\text{simpson}} = \frac{\sum_{i=1}^{S_{\text{obs}}} n_i(n_i - 1)}{N(N - 1)}$$

Where  $S_{\text{obs}}$  indicates the number of detected OTUs;  $n_i$  indicates the number of sequences contained in the OTU numbered as "i";  $N$  indicates the total number of sequences.
